# Supplementary material
Source: publisher site journal article supplement (https://www.dovepress.com/get_supplementary_file.php?f=285720.docx)
Supplement: Supplementary file 1 [file get_supplementary_file.php]

**Appendix Table 1: Socio-demographic and clinical characteristics of type 2 DM patients according to HIV status**

| **Characteristics** | **HIV-infected (n=119)** | **HIV-negative (n=238)** | **p-value** |
| --- | --- | --- | --- |
| **Age in years**  21-30  31-40  41-50  51-60  60+ | 2 (1.7%)  5 (4.2%)  35 (29.4%)  42 (35.3%)  35 (29.4%) | 1 (0.4%)  29 (12.2%)  43 (18.1%)  77 (32.4%)  88 (36.9%) | **0.011** |
| **Level of education**  No formal school  Less than primary education  Primary school completed Secondary school completed  College/University/Post-graduate degree | 18 (15.1%)  11 (9.2%)  39 (32.8%)  36 (30.3%)  15 (12.6%) | 23 (9.7%)  33 (13.9%)  43 (18.1%)  88 (37.0%)  51 (21.4%) | **0.004** |
| **Marital Status**  Never married  Currently married  Separated  Divorced  Widowed  Cohabiting | 58 (49.6%)  40 (34.2%)  0 (0.0%)  3 (2.6%)  14 (11.9%)  2 (1.7%) | 87 (36.7%)  112 (47.3%)  1 (0.4%)  6 (2.5%)  29 (12.2%)  2 (0.8%) | 0.199 |
| **Diabetes duration in years**  Less than 2  2-5  6-10  11 or more | 25 (21.0%)  37 (31.1%)  34 (28.6%)  23 (19.3%) | 52 (22.0%)  69 (29.2%)  52 (22.0%)  63 (26.7%) | 0.348 |
| **History of hypertension**  Yes  No | 80 (67.2%)  39 (32.8%) | 174 (73.1%)  64 (26.9%) | 0.248 |
| **Current antidiabetic treatment**  Diet alone  Oral hypoglycemic agents (OHA)  Insulin  Both OHA and Insulin | 0 (0.0%)  65 (54.6%)  10 (8.4%)  44 (37.0%) | 8 (3.4%)  152 (63.9%)  21 (8.8%)  57 (23.9%) | **0.020** |
| **Lipid lowering drug use**  Yes  No | 30 (25.2%)  89 (74.8%) | 64 (26.9%)  174 (73.1%) | 0.734 |

Bold indicates statistical significance
